# Supplementary material for: Long non-coding RNA levels can be modulated by 5-azacytidine in Schistosoma mansoni
Source: PubMed Central journal article supplement (PMC7725772; doi:10.1038/s41598-020-78669-5), 2020-12-09
Supplement: 41598_2020_78669_MOESM1_ESM.pdf [file 41598_2020_78669_MOESM1_ESM.pdf]

**Long non-coding RNA levels can be modulated by  
5-Azacytidine in *Schistosoma mansoni***

**Murilo S. Amaral<sup>1</sup>, Lucas F. Maciel<sup>1</sup>, Gilbert O. Silveira<sup>1,2</sup>, Giovanna G. O. Olberg<sup>1</sup>, João V. P. Leite<sup>1</sup>; Lucas K. Imamura<sup>1</sup>, Adriana S. A. Pereira<sup>1,2</sup>, Patricia A. Miyasato<sup>1</sup>, Eliana Nakano<sup>1</sup>, Sergio Verjovski-Almeida<sup>1,2\*</sup>**

<sup>1</sup>Laboratório de Parasitologia, Instituto Butantan, São Paulo, Brazil

<sup>2</sup>Departamento de Bioquímica, Instituto de Química, Universidade de São Paulo, São Paulo, Brazil

**Supplementary Figures S1 to S9** ..... pages 2 to 11  
**Supplementary References** ..... page 12

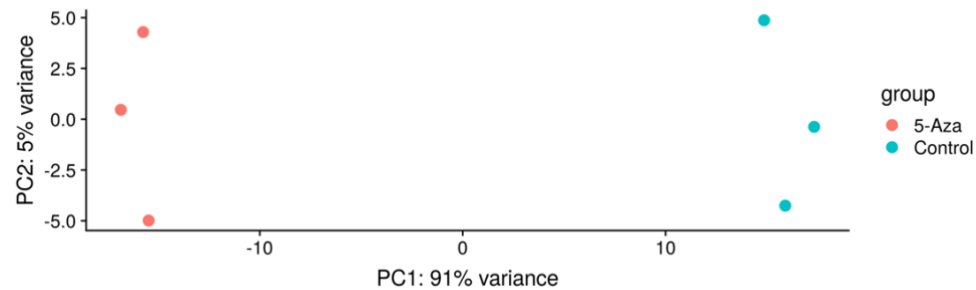

**Supplementary Figure S1: Clustering of RNA-Seq biological replicates assessed by principal component analysis (PCA).** RNA-Seq data from Geyer *et al.*, 2018 <sup>1</sup> were re-analyzed using the *S. mansoni* genome PRJEA36577 (v.7) retrieved from WormBase and the recently published transcriptome that includes long non-coding RNAs <sup>2</sup> as reference. PCA plot was obtained after normalization using the `vst` function followed by the `plotPCA` function from DESeq2. Both control and 5-AzaC treated *S. mansoni* female samples are represented by three biological replicates each ( $n = 3$ ), which are separated by their first two principal components. The control samples are represented by blue dots and the 5-AzaC treated samples by red dots.

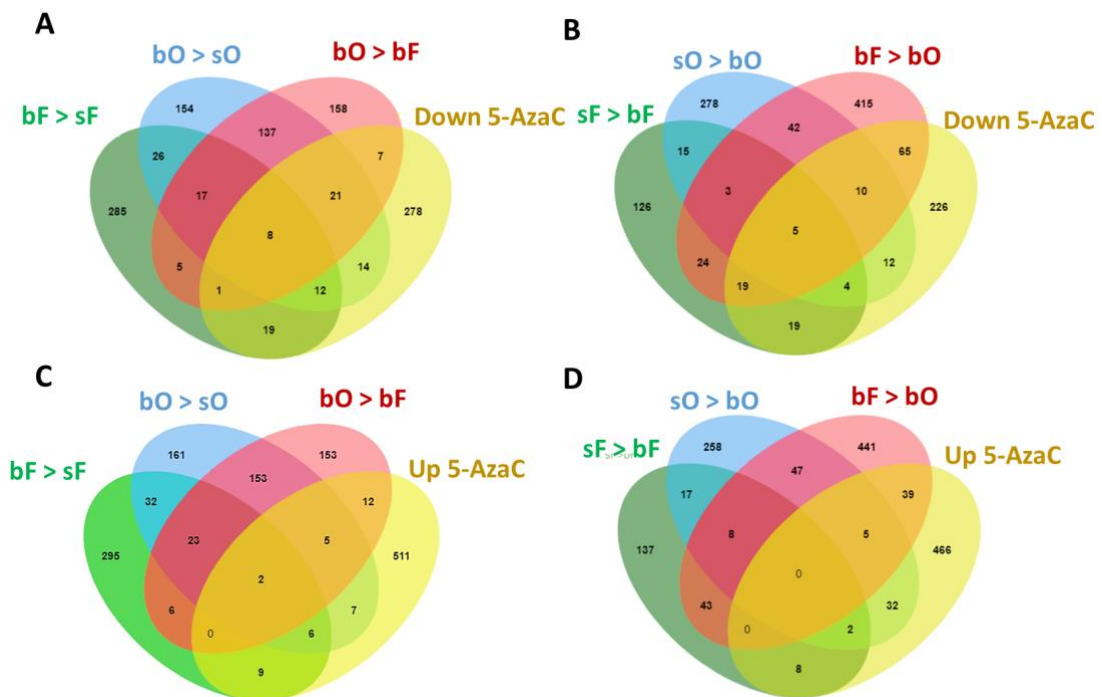

**Supplementary Figure S2: Venn diagram representing the number of lncRNAs differentially expressed in different conditions of female pairing compared with females under 5-AzaC exposure.** Re-analysis of RNA-seq public data from Lu *et al.*, 2016<sup>3</sup>, focusing on lncRNAs mapping and quantification, followed by comparison with lncRNAs differentially expressed in bisex females after 5-AzaC exposure, as determined by re-analysis of data from Geyer *et al.*, 2018<sup>1</sup>. **A.** lncRNAs downregulated in bisex females after 5-AzaC exposure are compared with lncRNAs differentially expressed between the following conditions: lncRNAs enriched in bisex (paired) females compared with single-sex (unpaired) females (bF>sF); lncRNAs enriched in ovaries from bisex (paired) females compared with ovaries from single-sex (unpaired) females (bO>sO); lncRNAs enriched in ovaries from bisex (paired) females compared with bisex (paired) females (bO>bF). **B.** lncRNAs downregulated in bisex females after 5-AzaC exposure are compared with lncRNAs differentially expressed between the following conditions: lncRNAs enriched in single-sex (unpaired) females compared with bisex (paired) females (sF>bF); lncRNAs enriched in ovaries from single-sex (unpaired) females compared with ovaries from bisex (paired) females (sO>bO); lncRNAs enriched in bisex (paired) females compared with ovaries from bisex (paired) females (bF>bO). **C.** lncRNAs upregulated in bisex females after 5-AzaC exposure are compared with lncRNAs differentially expressed between the following conditions: lncRNAs enriched in bisex (paired) females compared with single-sex

(unpaired) females (bF>sF); lncRNAs enriched in ovaries from bisex (paired) females compared with ovaries from single-sex (unpaired) females (bO>sO); lncRNAs enriched in ovaries from bisex (paired) females compared with bisex (paired) females (bO>bF). **D.** lncRNAs upregulated in bisex females after 5-AzaC exposure are compared with lncRNAs differentially expressed between the following conditions: lncRNAs enriched in single-sex (unpaired) females compared with bisex (paired) females (sF>bF); lncRNAs enriched in ovaries from single-sex (unpaired) females compared with ovaries from bisex (paired) females (sO>bO); lncRNAs enriched in bisex (paired) females compared with ovaries from bisex (paired) females (bF>bO). Samples are labeled as bF: bisex (paired) females; sF: single-sex (unpaired) females; bO: bisex (paired) ovaries; sO: single-sex (unpaired) ovaries, according to Lu *et al.*, 2016<sup>3</sup>.

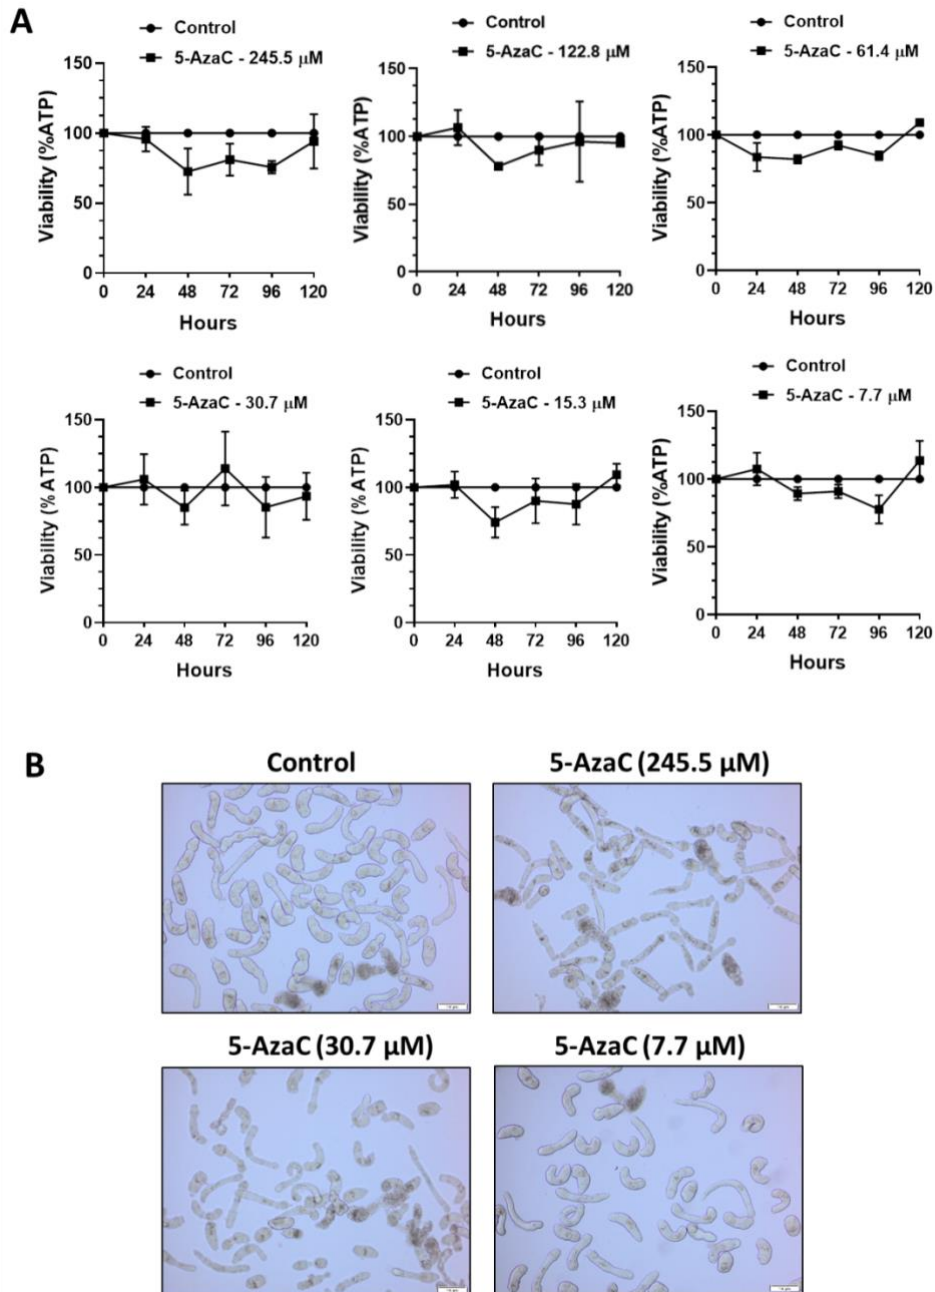

**Supplementary Figure S3: Evaluation of *S. mansoni* schistosomula viability after 5-AzaC treatment at different concentrations and incubation times. (A)** ATP quantitation using a luminescent assay to assess schistosomula survival under 5-AzaC exposure. *S. mansoni* schistosomula (100-110/well) were incubated with the indicated concentrations of 5-AzaC or with medium only (control) for 24, 48, 72, 96 and 120 h. Viability was expressed as % luminescence values relative to the control (medium only). Mean  $\pm$  SEM from two replicate experiments. Two-way ANOVA was applied, and no statistically significant difference was found in any of the comparisons. **(B)** Light microscopy of schistosomula incubated with the indicated concentrations of 5-AzaC or with medium only (control) for 120 h. Scale bar: 100  $\mu$ m.

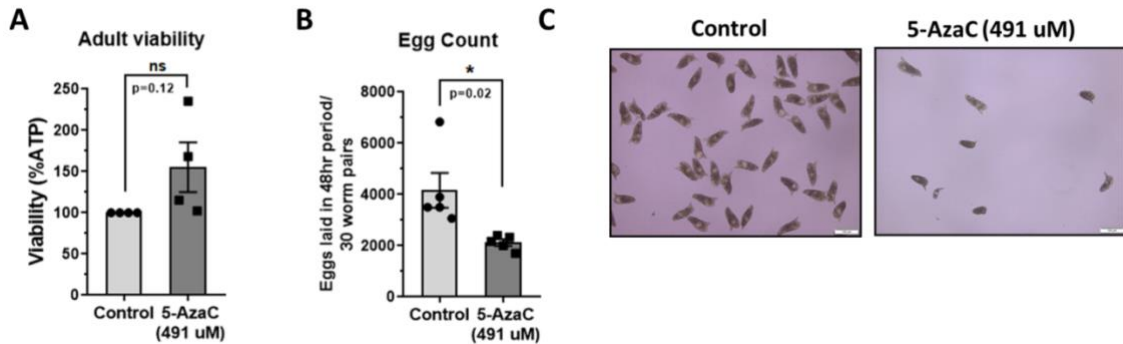

**Supplementary Figure S4: Effect of 5-AzaC treatment on adult *S. mansoni* viability and egg laying.** **A.** 5-AzaC does not affect adult *S. mansoni* viability. Nine worm pairs were cultivated in the presence ( $n = 5$ ) or absence ( $n = 5$ ) of  $491 \mu\text{M}$  5-AzaC for 48 h. Worms were collected and ATP levels were measured in control and treated worm couples. Student's unpaired two-sided t test; ns: not significant. **B.** 5-AzaC significantly inhibits *S. mansoni* egg production. Thirty adult worm pairs were cultured either in the presence or absence of  $491 \mu\text{M}$  5-AzaC. Each culture condition was replicated ( $n = 5$ ) and eggs were collected and counted after 48 hours. Mean  $\pm$  SEM are shown. Student's unpaired two-sided t test was applied. \*p-value = 0.02. **C.** Light microscopy of schistosome eggs laid by control worm pairs (control) or 5-AzaC treated worm pairs for 48 h (5-AzaC,  $491\mu\text{M}$ ). Scale bar:  $100 \mu\text{m}$ .

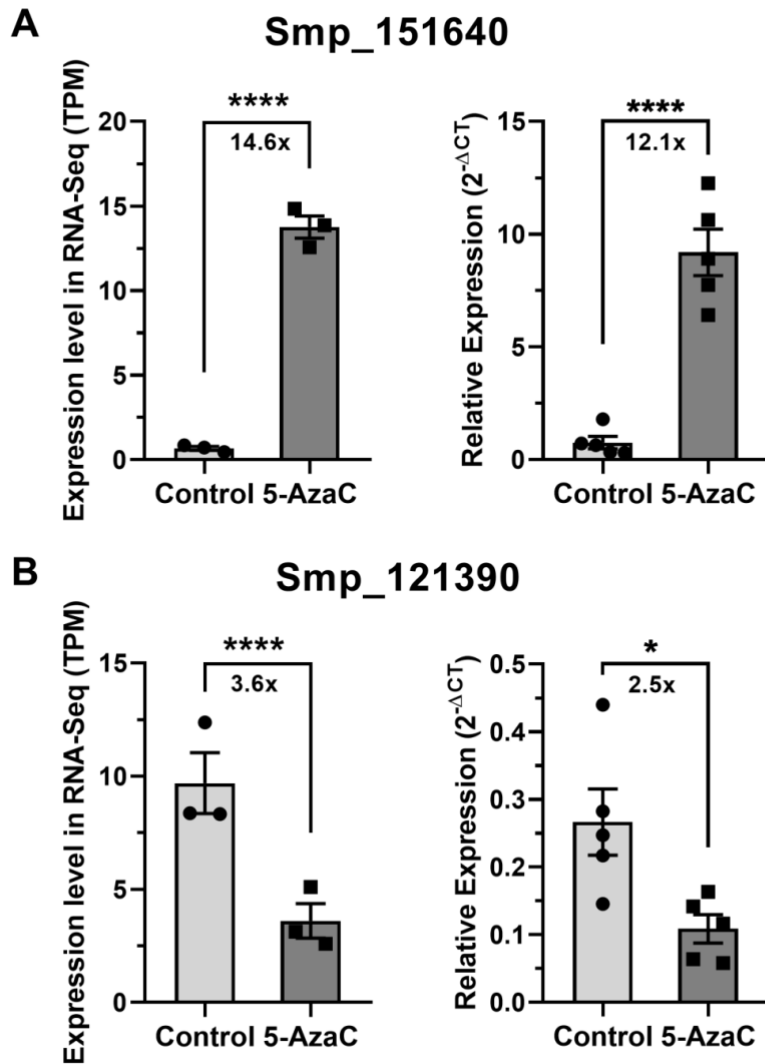

**Supplementary Figure S5: Expression profiles in *S. mansoni* females of selected protein-coding genes differentially expressed after 5-AzaC treatment (491  $\mu$ M).** Two protein-coding genes were used as controls after re-analysis of RNA-Seq public datasets of 5-AzaC treated *S. mansoni* females from Geyer *et al.*, 2018<sup>1</sup> for validation by RT-qPCR in females. For each of the two protein-coding genes, their expression profiles in RNA-Seq are shown as TPM (transcripts per million) on the left, whereas the RT-qPCR results are shown on the right: **A.** Smp\_151640 (*Insulin-like growth factor I*); **B.** Smp\_121390 (*Genome polyprotein*). For the RNA-Seq data, three biological replicates were analyzed; the fold-changes and p-values represented by asterisks that are shown in the brackets were obtained using DESeq2. For the RT-qPCR data, mean  $\pm$  SEM from five biological replicates are shown; \* $p < 0.05$ , \*\*\*\* $p < 0.0001$ . Student's unpaired two-sided t test.

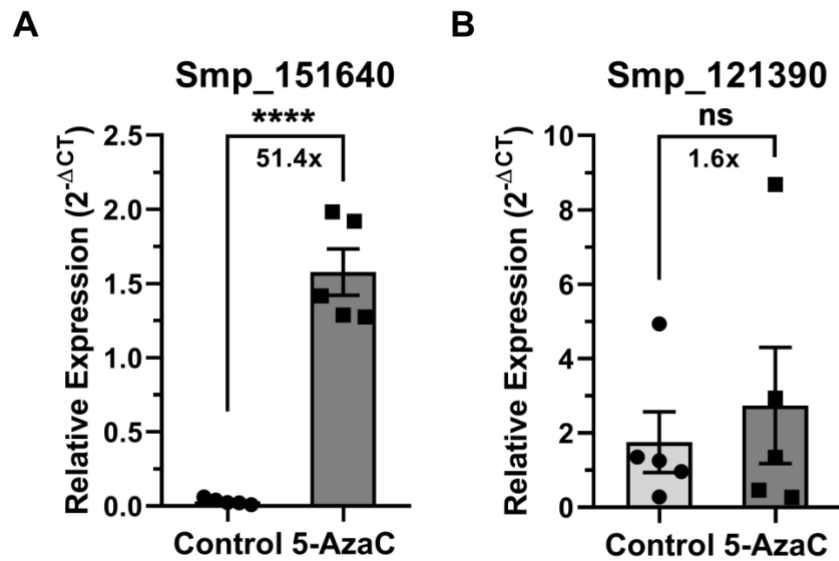

**Supplementary Figure S6: Expression profiles in *S. mansoni* males of selected protein-coding genes differentially expressed after 5-AzaC treatment (491  $\mu$ M).** Two protein-coding genes were used as controls after re-analysis of RNA-Seq public datasets of 5-AzaC treated *S. mansoni* females from Geyer *et al.*, 2018<sup>1</sup> for evaluation of differential expression by RT-qPCR in males. For each of the two protein-coding genes, the expression profiles in controls and in 5-AzaC treated *S. mansoni* males by RT-qPCR are shown: **A.** Smp\_151640 (*Insulin-like growth factor I*); **B.** Smp\_121390 (*Genome polyprotein*). Mean  $\pm$  SEM from five biological replicates are shown; Student's unpaired two-sided t test was applied. \*\*\*\* $p < 0.0001$ ; ns: not significant.



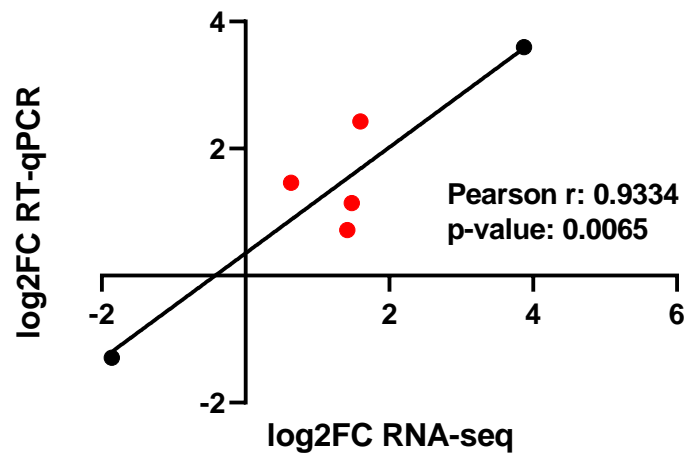

**Supplementary Figure S7: Correlation between RNA-Seq and RT-qPCR analysis.** Pearson correlation between the fold changes (FC) in expression measured by RNA-seq or RT-qPCR of six selected genes (four lincRNAs – red dots – and two protein-coding genes – black dots); fold changes were obtained by measuring the expression after treatment of females with 5-AzaC and comparing with expression in the control condition. Log<sub>2</sub>FC of the six genes obtained with the RNA-Seq assay is represented in the x-axis, and log<sub>2</sub>FC of the six genes obtained with RT-qPCR is represented in the y-axis.

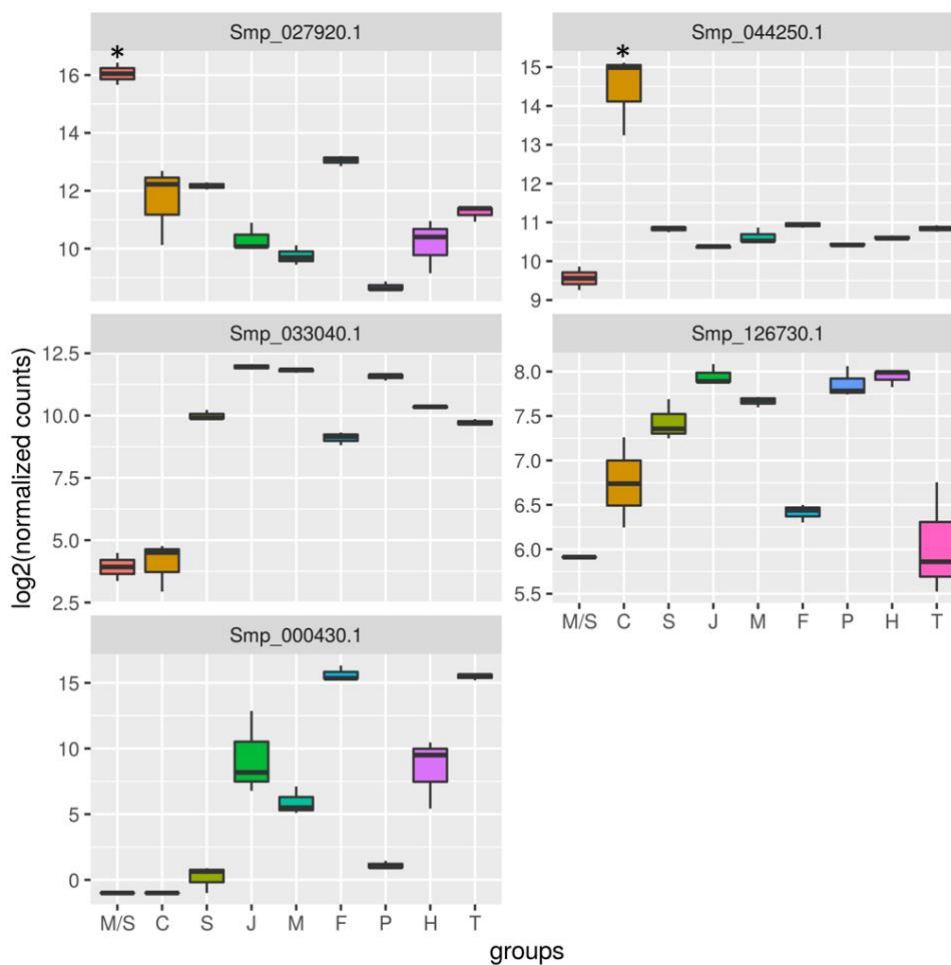

**Supplementary Figure S8: RNA-seq expression levels in *different S. mansoni* stages of protein-coding genes used as sample markers.** The expression levels (shown as log<sub>2</sub> of normalized counts) of the five protein-coding genes whose gene IDs are indicated at the top of each panel are shown. The y-axis shows the expression level for each protein-coding gene in the RNA-seq assays (log<sub>2</sub> of normalized counts) as determined at the stage indicated in the x-axis as follows: miracidia/sporocysts (M/S), cercariae (C), schistosomula (S), juveniles (J), adult males (M), adult females (F), posterior somatic tissues (P), heads (H) and tails (T). **A.** Smp\_027920 (*Tubulin alpha-1 chain*, with high expression in eggs); **B.** Smp\_044250 (*STAM-binding protein*, with high expression in cercariae); **C.** Smp\_033040 (*L-lactate dehydrogenase A chain*, with high expression in schistosomula, juveniles and adult males); **D.** Smp\_126730 (*5-hydroxytryptamine receptor 1A*, with high expression in juveniles and adult males); **E.** Smp\_000430 (*Putative eggshell protein*, with high expression in adult females). Only transcripts that were upregulated in one stage/tissue when compared with all others were considered as significantly more expressed in that stage/tissue and are marked with an asterisk. \*p-value < 0.05.

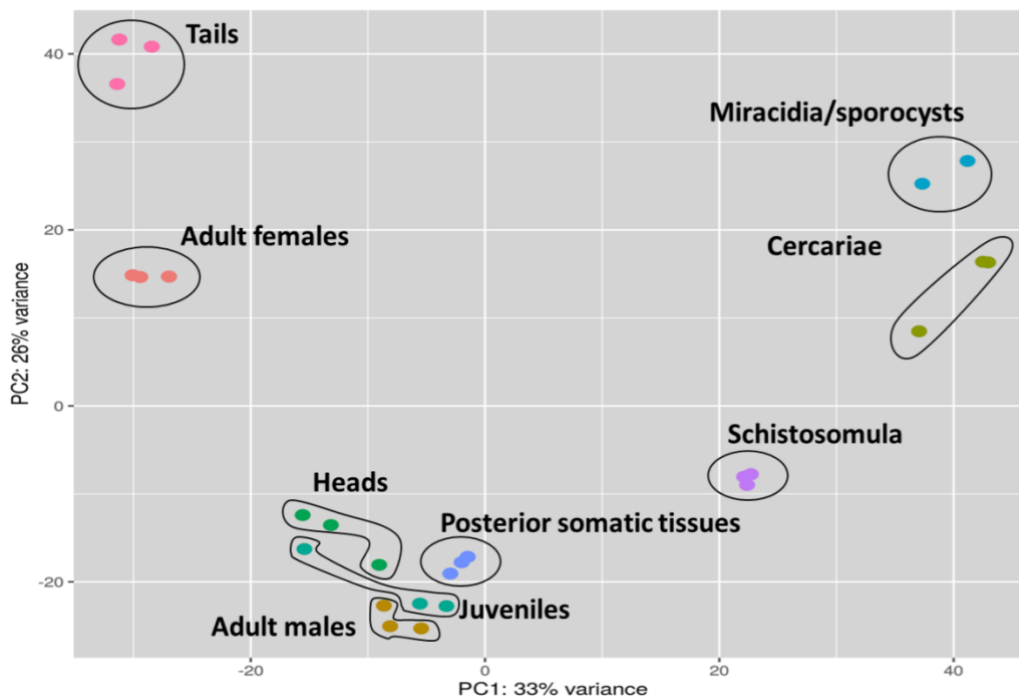

**Supplementary Figure S9: Clustering of RNA-Seq biological replicates assessed by principal component analysis (PCA).** RNA-Seq data from 26 public RNA-Seq libraries (listed in Supplementary Table S7) representing six life-cycle stages (miracidia/sporocysts, cercariae, schistosomula, juveniles, adult males, adult females) and adult worm heads, tails and posterior somatic tissues were re-analyzed using the *S. mansoni* genome PRJEA36577 (v.7) retrieved from WormBase and the recently published transcriptome that includes long non-coding RNAs<sup>2</sup> as reference. PCA plot was obtained after normalization using the `vst` function followed by the `plotPCA` function from DESeq2.

## Supplementary References

- 1 Geyer, K. K. *et al.* The anti-fecundity effect of 5-azacytidine (5-AzaC) on *Schistosoma mansoni* is linked to dis-regulated transcription, translation and stem cell activities. *Int J Parasitol Drugs Drug Resist* **8**, 213-222, doi:10.1016/j.ijpddr.2018.03.006 (2018).
- 2 Maciel, L. F. *et al.* Weighted Gene Co-Expression Analyses Point to Long Non-Coding RNA Hub Genes at Different *Schistosoma mansoni* Life-Cycle Stages. *Front Genet* **10**, 823, doi:10.3389/fgene.2019.00823 (2019).
- 3 Lu, Z. *et al.* Schistosome sex matters: a deep view into gonad-specific and pairing-dependent transcriptomes reveals a complex gender interplay. *Sci Rep* **6**, 31150, doi:10.1038/srep31150 (2016).
